# Supplementary material for: Versatile chiroptics of peptide-induced assemblies of metalloporphyrins
Source: Royal Society of Chemistry journal article supplement (doi:10.1039/b920058d), 2010-01-01
Supplement: b920058d.pdf [file b920058d.pdf]

## Supplementary Information

### Versatile chiroptics of peptide-induced assemblies of metalloporphyrins

Hirokuni Jintoku,<sup>a</sup> Takashi Sagawa,<sup>b</sup> Tsuyoshi Sawada,<sup>a</sup> Makoto Takafuji,<sup>a</sup> and Hirotaka Ihara<sup>a\*</sup>

<sup>a</sup> *Department of Applied Chemistry and Biochemistry, Kumamoto University, Kumamoto-shi, Kumamoto 860-8555, Japan*

<sup>b</sup> *Institute of Advanced Energy, Kyoto University, Uji Kyoto 611-0011, Japan*

**Table S1** Solubility of **GTPP** and **GTPP-Zn** at 25 °C

| solvent          | GTPP | GTPP-Zn |
|------------------|------|---------|
| water            | I    | I       |
| acetonitrile     | SSS  | I       |
| tetrahydrofuran  | SSS  | SSS     |
| benzene          | SSS  | SSS     |
| diethyl ether    | I    | SSS     |
| cyclohexane      | I    | SS      |
| <i>n</i> -hexane | I    | S       |

The all samples (1 mM) were heated at 60 - 70 °C and then cooled to 25 °C. "I" indicates almost insoluble, and the solubility is higher in the order of "SSS", "SS" and "S".

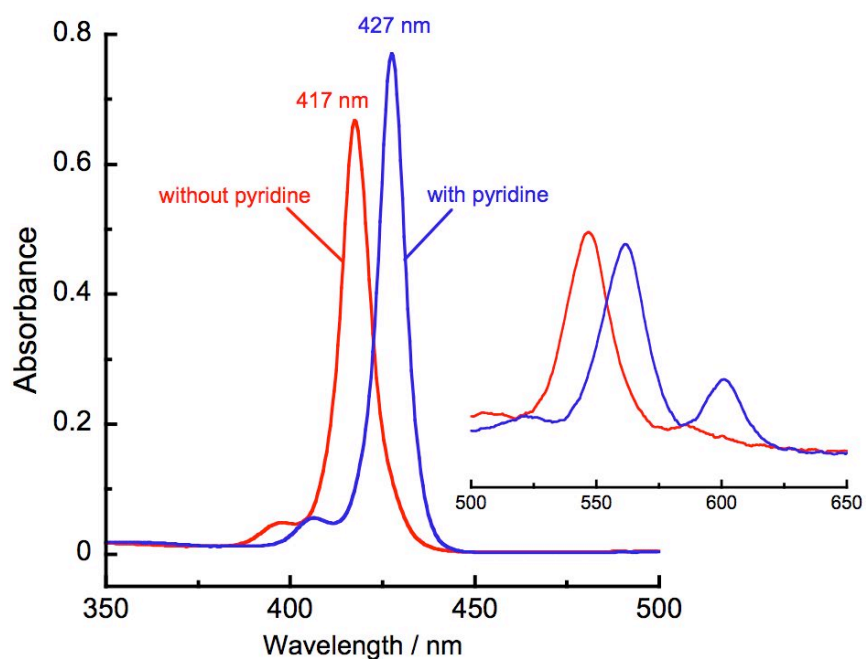

**Fig. S1** UV-visible spectra of **GTPP-Zn** (1 μM) with 1 equiv of pyridine in cyclohexane at 20 °C using 10 mm quartz cell.

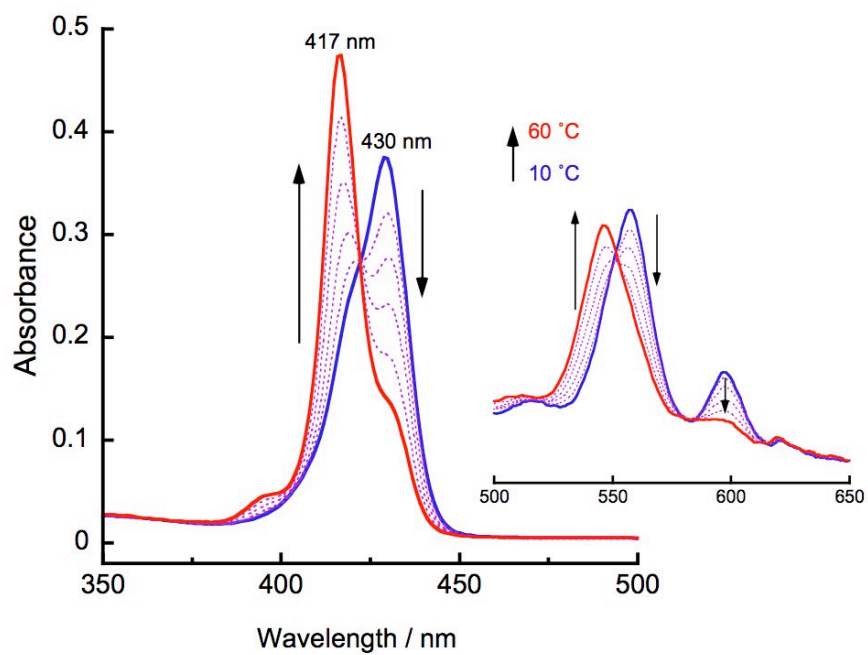

**Fig. S2** Temperature dependency of UV-visible spectra of **GTPP-Zn** (10 μM) in cyclohexane using 1.0 mm quartz cell.

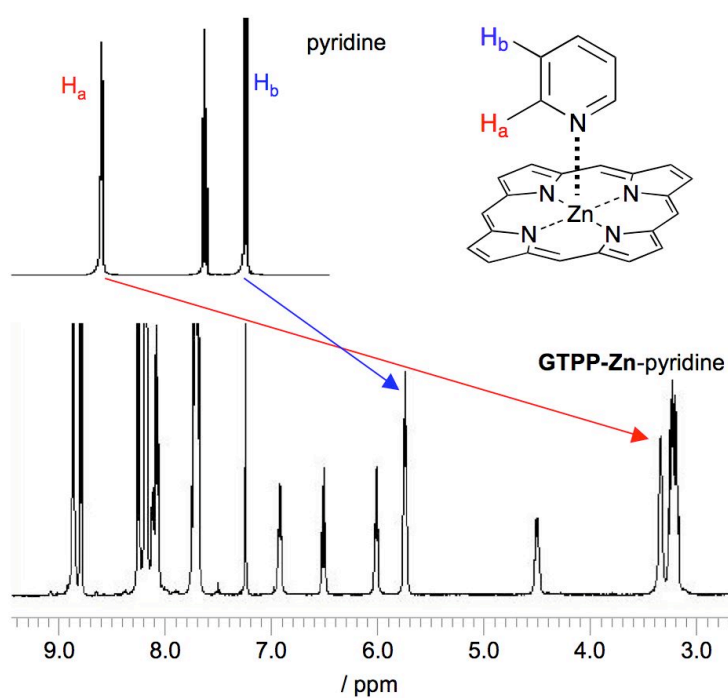

**Fig. S3** <sup>1</sup>H-NMR spectra of pyridine and **GTPP-Zn**-pyridine complex in chloroform-*d* at 25 °C.

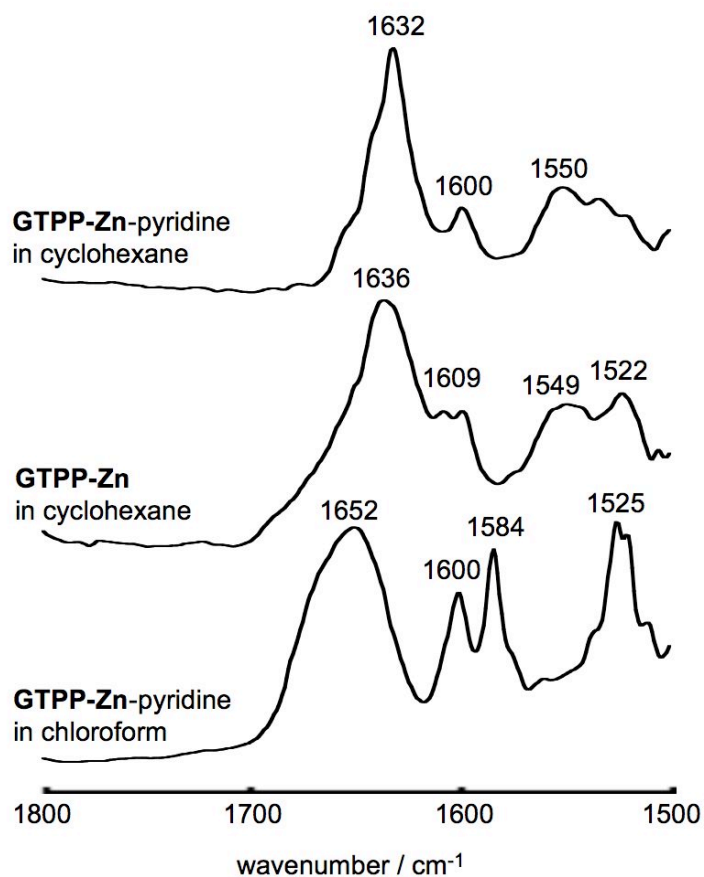

**Fig. S4** FT-IR spectra of **GTPP-Zn** with 10 equiv of pyridine in various solvents.
